# Supplementary material for: How Effective Are Macroprudential Policy Instruments? Evidence from Turkey
Source: MDPI journal article supplement (doi:10.3390/economies10040076), 2022-03-24
Supplement: s1 [file s1]

|               | ADF <sup>a</sup>         |                  |                           | PP <sup>b</sup>          |                   |                           | KPSS <sup>c</sup> |                           |
|---------------|--------------------------|------------------|---------------------------|--------------------------|-------------------|---------------------------|-------------------|---------------------------|
| Variables     | No Intercept<br>No Trend | Intercept        | Intercept<br>and<br>Trend | No Intercept<br>No Trend | Intercept         | Intercept<br>and<br>Trend | Intercept         | Intercept<br>and<br>Trend |
| <i>U</i>      | -0,138<br>(13)           | -3,584**<br>(12) | -3,575***<br>(12)         | -0,296<br>(16)           | -2,397<br>(11)    | -2,479<br>(11)            | 0,207<br>(10)     | 0,199***<br>(10)          |
| $\Delta U$    | -2,807**<br>(12)         |                  |                           | -9,386**<br>(118)        | -9,319**<br>(118) | -11,051**<br>(115)        | 0,083<br>(16)     | 0,041<br>(16)             |
| <i>CPI</i>    | 7,281<br>(2)             | 5,259<br>(2)     | 2,318<br>(2)              | 10,055<br>(6)            | 7,152<br>(10)     | 3,174<br>(11)             | 1,607***<br>(10)  | 0,388***<br>(10)          |
| $\Delta CPI$  | -1,991**<br>(4)          | -3,483**<br>(4)  | -9,918<br>(1)             | -5,510**<br>(6)          | -6,945**<br>(11)  | -7,37**<br>(23)           | 1,439<br>(6)      | 0,212<br>(5)              |
| <i>CA</i>     | -11,852**<br>(0)         | -11,819**<br>(0) | -12,325**<br>(0)          | -11,990**<br>(4)         | -11,960**<br>(4)  | -12,320**<br>(1)          | 0,648<br>(5)      | 0,058<br>(2)              |
| $\Delta CA$   |                          |                  |                           |                          |                   |                           |                   |                           |
| <i>SPRD</i>   | -1,456<br>(0)            | -3,183***<br>(1) | -3,913***<br>(1)          | -1,527<br>(8)            | -3,088***<br>(3)  | -3,706***<br>(2)          | 0,784**<br>(10)   | 0,117***<br>(9)           |
| $\Delta SPRD$ | -11,659**<br>(0)         |                  |                           | -11,568**<br>(8)         |                   |                           | 0,042<br>(6)      | 0,041<br>(6)              |
| <i>RR</i>     | -1,246<br>(1)            | -1,868<br>(1)    | -1,929<br>(1)             | -1,271<br>(8)            | -1,933<br>(8)     | -1,965<br>(8)             | 0,302<br>(10)     | 0,290**<br>(10)           |
| $\Delta RR$   | -8,062**<br>(0)          | -8,041**<br>(0)  | -8,071**<br>(0)           | -8,150**<br>(4)          | -8,129**<br>(4)   | -8,158**<br>(4)           |                   | 0,038<br>(8)              |
| <i>ON</i>     | -0,739<br>(1)            | -2,256<br>(1)    | -2,267<br>(1)             | -0,710<br>(8)            | -2,069<br>(8)     | -2,077<br>(8)             | 0,286<br>(10)     | 0,282**<br>(10)           |
| $\Delta ON$   | -6,848**<br>(0)          | -6,830**<br>(0)  | -6,839**<br>(0)           | -6,904**<br>(1)          | -6,886**<br>(1)   | -6,896**<br>(1)           |                   | 0,039<br>(8)              |
| <i>CRED</i>   | 4,887<br>(2)             | 3,249<br>(2)     | 0,351<br>(2)              | 7,408<br>(6)             | 4,224<br>(6)      | 0,782<br>(6)              | 1,657**<br>(10)   | 0,410**<br>(10)           |
| $\Delta CRED$ | -3,663**<br>(2)          | -6,386**<br>(0)  | -7,430**<br>(1)           | -5,261**<br>(5)          | -6,380**<br>(5)   | -6,999**<br>(3)           | 0,871**<br>(8)    | 0,070<br>(6)              |
| <i>USD</i>    | 4,211<br>(2)             | 2,952<br>(2)     | 0,305<br>(2)              | 4,826<br>(8)             | 3,509<br>(9)      | 0,414<br>(8)              | 1,446**<br>(10)   | 0,402**<br>(10)           |
| $\Delta USD$  | -6,236**<br>(2)          | -6,773**<br>(2)  | -11,536**<br>(1)          | -8,250**<br>(2)          | -8,070**<br>(6)   | -8,690**<br>(11)          | 0,755**<br>(1)    | 0,073<br>(8)              |
| <i>RSRV</i>   | 0,911<br>(3)             | 0,056<br>(3)     | -0,775<br>(3)             | 2,276<br>(6)             | 1,765<br>(6)      | 0,721<br>(6)              | 0,695<br>(10)     | 0,207<br>(10)             |
| $\Delta RSRV$ | -4,694**<br>(2)          | -4,830**<br>(2)  | -5,090**<br>(2)           | -7,926**<br>(6)          | -8,006**<br>(5)   | -8,226**<br>(5)           |                   |                           |
| <i>FED</i>    | -2,370**<br>(1)          | -2,095<br>(1)    | -1,811<br>(1)             | -2,071**<br>(8)          | -1,790<br>(8)     | -1,575<br>(8)             | 0,524<br>(10)     | 0,317**<br>(10)           |
| $\Delta FED$  |                          | -6,939**<br>(0)  | -7,018**<br>(0)           |                          | -6,810**<br>(4)   | -6,881**<br>(5)           |                   | 0,111<br>(8)              |
| <i>CP</i>     | -0,044<br>(6)            | -12,342**<br>(0) | -12,341**<br>(0)          | -0,330<br>(14)           | -12,342**<br>(0)  | -12,343**<br>(0)          | 0,105<br>(1)      | 0,088<br>(0)              |
| $\Delta CP$   | -11,089**<br>(5)         |                  |                           | -57,160**<br>(34)        |                   |                           |                   |                           |
| <i>VIX</i>    | -1,577<br>(0)            | -4,295**<br>(0)  | -4,357**<br>(0)           | -1,077<br>(11)           | -4,272**<br>(2)   | -4,339**<br>(2)           | 0,269<br>(9)      | 0,148<br>(9)              |
| $\Delta VIX$  | -11,632**<br>(1)         |                  |                           | -17,179**<br>(17)        |                   |                           |                   |                           |
| <i>IP</i>     | -0,129<br>(2)            | -2,713<br>(2)    | -2,710<br>(2)             | -0,085<br>(7)            | -2,912<br>(3)     | -2,908<br>(3)             | 0,155<br>(10)     | 0,148<br>(10)             |
| $\Delta IP$   | -10,690**<br>(1)         | -10,659**<br>(1) | -10,630**<br>(1)          | -10,773**<br>(11)        | -10,734**<br>(11) | -10,695**<br>(11)         |                   |                           |

Notes:

\*\* and \*\*\* indicates rejection of the null hypothesis at 1 percent and 5 percent respectively.

a Lag length is presented in brackets. Lag length is selected based on Schwartz information criteria when maximum lag length is 13.

b Bandwidth is in brackets and was chosen by Newey-West algorithm using Bartlett kernel.

c Bandwidth is in brackets .
